# Supplementary material
Source: publisher figshare collection journal article supplement (https://acs.figshare.com/ndownloader/files/4687765)
Supplement: Supplementary file 1 [file 4687765]

# Novel supramolecular assemblies of coordination polymers of Zn(II) and bis(4-nitrophenyl)phosphoric acid with some aza-donor compounds

Samipillai Marivel and Venkateswara Rao Pedireddi\*

Solid State & Supramolecular Structural Chemistry Lab, Division of Organic Chemistry,

National Chemical Laboratory, Dr. Homi Bhabha Road, Pune 411 008, India. Fax: +91

20 25902624; Tel: +91 20 25902097; E-mail: [vr.pedireddi@ncl.res.i](mailto:vr.pedireddi@ncl.res.i)

Supporting Information:

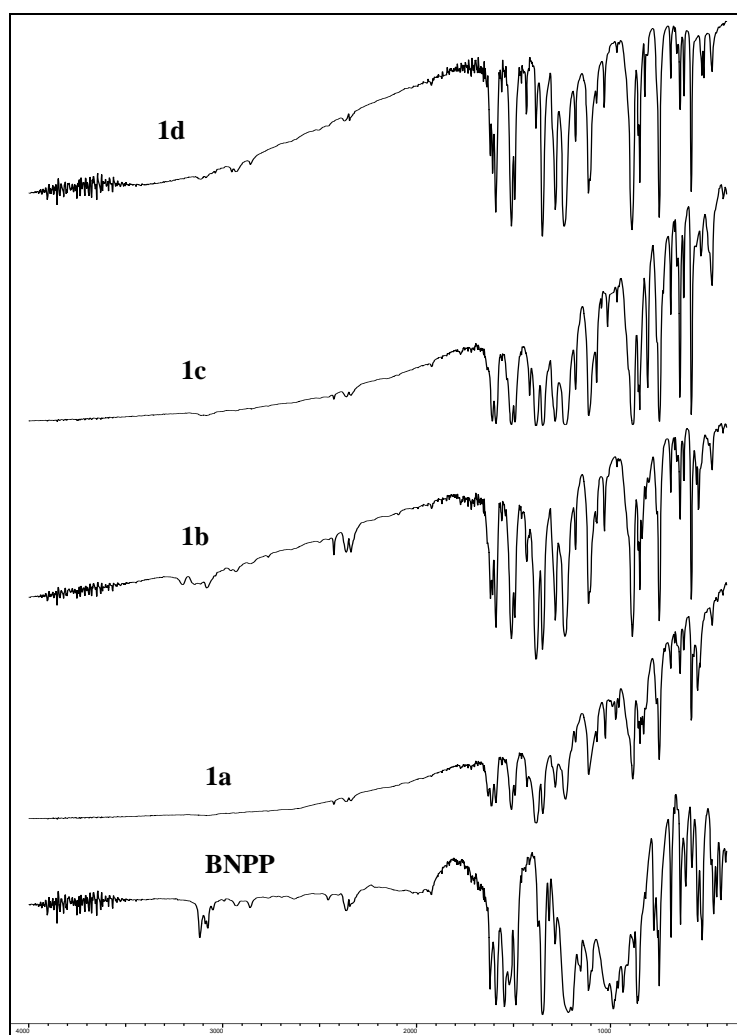

FT-IR spectra of **BNPP** and the complexes **1a**, **1b**, **1c** and **1d** recorded in KBr.
